# Supplementary material for: Breeding implications of nodulation performance and root structure under natural inoculation for soil fertility enhancement and sustainable cowpea production
Source: Frontiers journal article supplement (doi:10.3389/fsufs.2022.1076760), 2022-12-08
Supplement: Table_1.XLSX [file Table_1.XLSX]

## Sheet: Sheet1
SN	Origin	Genotypes code	Genotypes name	DF	DM	PH	SD	NW	FWA	FWBRL	TNBR	BRBD	BRD	TRW	TRBD	TRL	NAdR	ARD	ARL	NN	NS	ND	NV	AdBrD	Yld
1	Ethiopia	G1	NLLP-CPC-07-25	50.75	83.25	60.45	10.1975	1	40.025	19.7917	4	2.16667	1.16042	4.62292	5.41667	42.5	3.83333	0.45375	7.58333	1.125	2.575	6.25	0.25	3.11382	983.235
2	Ethiopia	G2	NLLP-CPC-07-17	47.75	84	53.65	9.36958	1	29.1667	16.9833	5.04167	1.84083	1.16167	4.81167	7.83333	36.4583	3.58333	0.714583	10.25	4.5	2.16667	4.58333	0.304167	2.91667	1075.33
3	Ethiopia	G3	NLLP-CPC-07-90	55.25	72	65.575	9.14583	1.08333	24.9167	23.0833	3.33333	2.34083	1.02333	4.02375	8.20833	51.0417	3.875	0.42625	9.25	1.08333	0.916667	6.875	0.608333	3.66667	418.088
4	Ethiopia	G4	NLLP-CPC-07-98	55.75	74.25	70.525	11.3975	1.125	28.5417	21	3.79167	2.58333	1.38417	5.26083	9.58333	42.2917	5.08333	0.495833	13.5833	1.75	0.75	5	0.5125	2.82759	531.765
5	Ethiopia	G5	NLLP-CPC-07-84	50.75	66	51.6	9.93833	1.08333	38.75	23.1667	3.75	2.5	1.6875	4.36125	8.08333	36.875	3.91667	0.590833	9	3.83333	2.33333	5	0.883333	3.70833	796.397
6	Ethiopia	G6	ACC-227-104-A	46.5	66.5	51.5825	10.3137	1	26.6667	23.7917	3.625	2	0.987917	4.61917	7.875	40.125	4.95833	0.64125	6.16667	1.125	1.33333	6.25	5	1.03106	846.25
7	Ethiopia	G7	ACC-227-104-C	46.25	66.5	49.2675	9.01333	1	26.25	16.8333	3.75	2.20833	1.00167	4.6075	6.91667	33.3333	6.16583	0.624167	10.7083	2.83333	2.875	3.33333	0.2	3.16667	463.125
8	Ethiopia	G8	NLLP-CPC-07-67-A	51.5	77	58.4525	11.5717	1	25	20.6667	4.75	3.25	1.35833	5.22417	6.54167	36.0417	4.02333	0.405	9.95833	2.45833	4	6.25	0.175	3.34294	1191.43
9	Ethiopia	G9	NLLP-CPC-07-27-B	56.5	73.75	56.45	11.8929	1.08333	24.375	18.8333	5.41667	2.66667	1.62625	5.405	7.08333	32.9167	5.25	0.330833	4.58333	2.58333	1.375	6.25	0.333333	2.83333	1652.1
10	Ethiopia	G10	NLLP-CPC-07-66-A	52.75	72.5	72.115	12.1929	1	25.625	26.0417	3.91667	2.33333	1.15667	5.10292	8.54167	39.6875	7.58333	0.406667	6.66667	1.625	1.66667	5.01667	1.375	2.57829	867.904
11	Ethiopia	G11	NLLP-CPC-07-48	53.5	75.5	65.6	12.1192	1	29.1667	19	5.83333	2.66667	1.00333	5.97958	6.41667	39.1667	7.41667	0.654167	11.1667	3.33333	2.33333	4.16667	0.475	1.79167	614.191
12	Ethiopia	G12	NLLP-CPC-07-43-A	46.5	73	47.5675	9.66958	1	26.875	14.1667	3.05667	2.20833	1.00542	4.45083	10.0833	39.1667	4.22167	0.344167	10.9167	1.58333	1.5	4.16667	0.3	1	990.699
13	Ethiopia	G13	NLLP-CPC-07-43-B	48	74.75	71.2675	10.5329	1	34.1667	14.9167	2.95833	2.79167	1.45125	4.7825	7.125	35.6667	4.29167	0.573333	13.9583	3.33333	1.66667	5	0.475	2.19601	1102.21
14	Ethiopia	G14	NLLP-CPC-07-59-A	53.25	76.5	83.365	10.5946	1	27.2917	17.75	3.29167	1.79167	1.39375	4.43021	7.58333	43.1667	3.79167	0.440417	7.83333	1.16667	3.08333	6.25	0.8	2.91667	1121.18
15	Ethiopia	G15	NLLP-CPC-07-59-B	57.25	80.25	53.2825	11.2417	1	27.9167	16.9167	3.58333	2.66667	1.53208	3.775	9.5	37.0833	4.08333	0.541667	8.58333	3	2.58333	4.16667	1.03333	3.5	979.963
16	Ethiopia	G16	NLLP-CPC-07-108	52	75.75	69.8	9.455	1	20.8333	16.2917	3.875	2.41667	1.07583	5.11542	8.54167	45	7.125	2.575	16.5833	2.45833	2.75	5	0.5	1.49457	220.478
17	Ethiopia	G17	NLLP-CPC-07-57	48	75	73.2175	9.54167	1	20.8333	19.1667	3.16667	2.41667	1.5975	4.84542	10.0417	43.5833	4.04167	0.590417	10.125	8.08417	1.75	5.83333	0.4125	2.75	649.118
18	Ethiopia	G18	ACC-215-762	51.5	77.5	84.535	10.2167	1	30.625	17.3333	2.80833	5.67083	1.93	4.54292	7	39.1667	3.16667	0.314167	8.04167	3	3.66667	5	0.708333	1.82465	868.86
19	Ethiopia	G19	NLLP-CPC-112-A	46.75	71.25	45.65	9.6775	1	27.9167	16	4.66667	2.66667	1.27083	4.86042	9.33333	40	3.625	0.439583	7	2.25	3.08333	5.625	0.179167	2.0597	488.603
20	Ethiopia	G20	NLLP-CPC-112-B	54.5	84.75	51.9	10.1267	1	30.4167	21.3333	4.20833	1.79167	0.843333	4.23	8.125	38.0833	5.21833	0.715833	9.625	3.36111	3.41667	6.25	0.525	5.44237	640.809
21	Ethiopia	G21	NLLP-CPC-07-35	54	77	48.825	11.5788	1	28.5417	22.9167	3.83333	1.9	1.34375	4.45625	6.29167	37.7083	7.25	0.17625	7.25	1.08333	2.41667	5	0.1125	3.5	799.596
22	Ethiopia	G22	NLLP-CPC-120	48.75	71.25	39.45	9.36	1	22.5	21.8333	3.33333	1.33333	1.51583	6.595	7.58333	46.875	5.91667	0.51	10.6667	1.08333	2.25	6.25	1.75833	2.66667	533.934
23	Ethiopia	G23	ACC-211-430	56.25	86	64.875	10.3662	1	30.1667	21.0833	3.83333	2.83333	1.32208	4.95042	7.79167	41.6667	5.16667	0.238333	12.25	1.91667	2.875	6.25	0.308333	5.125	987.5
24	Ethiopia	G24	NLLP-CPC-07-61	59.75	83.25	78.25	11.5675	1	28.3333	18.9167	4	2.41667	1.23167	5.80417	7.375	41.875	6.95833	5.12083	12.9167	3.25	1.95833	5	3.15833	4.5	479.265
25	Ethiopia	G25	NLLP-CPC-115	55.75	80	65.6175	10.3117	1	28.5417	22.1667	3.29167	1.875	0.924167	5.26167	9.5	44.5833	4.83333	0.236667	7.41667	3.5	2.25	5.625	0.691667	1.77656	659.007
26	Ethiopia	G26	ACC-216-748	53	76	58.425	11.0658	1	29.5833	21.0833	3.33333	2.125	0.890417	5.2875	7.83333	40.625	4.29167	0.668333	9.58333	0.75	2.2275	5	0.593571	2.01708	725.368
27	Ethiopia	G27	ACC-211-383	46.25	73.5	46.3175	10.2242	1	24.1667	17.75	4	3.25	1.37708	5.49625	6.83333	38.9583	6.25	0.40375	13.5417	2.70833	2.5	4.5	0.065	4.125	347.316
28	Ethiopia	G28	NLLP-CPC-07-68	54.5	78.75	79.4	11.5867	1	28.75	18.75	6.83333	2.41667	1.8	4.62542	8.16667	39.5833	5.04167	0.26	9.08333	3.41667	2.16667	5	0.276667	3.34524	665.441
29	Ethiopia	G29	NLLP-CPC-106-A	47	73.75	50.2	10.4867	1	25.4167	18.0833	3.91667	2	0.955833	4.3075	7.5	36.8333	5.29167	0.410833	7.38917	2.16667	4.20833	4.16667	0.875	3.50549	322.721
30	Ethiopia	G30	NLLP-CPC-106-B	56.25	80	71.5	11.4042	1	25.4167	25.5417	4	2.41667	3.36417	6.62417	8.58333	41.7917	5.79167	0.58	9.70833	1.5	4.41667	5	0.1625	5.58333	542.868
31	Ethiopia	G31	NLLP-CPC-118-A	53	78.75	93.0175	10.6675	1	27.0833	25.7917	5.125	3.08333	1.21167	5.14917	10.625	40.8333	4.58333	0.41125	6.33333	1	2.45833	6.25	0.4875	2.25	652.537
32	Ethiopia	G32	NLLP-CPC-118-B	55.5	79.75	67.95	11.8712	1	28.75	22	2.83333	2.66667	1.42	4.76917	7.875	39.5833	4.29167	0.564167	20.7917	5.08333	2.10833	5.83333	0.3875	2.05166	439.706
33	Ethiopia	G33	NLLP-CPC-118-D	53.5	80.5	74.55	10.4787	1	27.5	24.2083	4.83333	2.125	1.52708	5.9425	7.79167	41.25	4.16667	0.4225	13.9167	2.5	3.16667	5	0.608333	1.27369	575.037
34	Ethiopia	G34	NLLP-CPC-118-E	54.75	80.75	45.3675	11.8525	1.08333	28.3333	17.625	3	3.08333	1.31917	5.06667	7.83333	33.75	5	0.554167	8.625	1	1.33333	7.08417	1.05	1.33333	872.022
35	Ethiopia	G35	NLLP-CPC-105-A	62	86.25	89.5175	9.47833	1	25.8333	22.8333	5	3.16667	0.91	8.08917	8	44.1667	3.08333	0.3525	8.58333	1.20833	2.29167	4.30556	0.4625	2.34762	239.081
36	Ethiopia	G36	NLLP-CPC-07-124	53.25	78.75	79.5675	10.8846	1	22.9167	18.4583	3.45833	4.25417	2.03375	6.58083	9.33333	41.3333	6.58333	0.485417	10.75	1.25	3.66667	5	0.245833	1.28911	1108.24
37	Ethiopia	G37	NLLP-CPC-07-125	58.25	78.5	49.1	10.6454	1	27.9167	30.5	3.25	2.125	1.4925	4.805	8.08333	33.125	4.33333	0.601667	10.4375	2.5	3.41667	5	0.3825	0.791887	351.912
38	Ethiopia	G38	NLLP-CPC-07-126	52.75	77.25	70.7	9.64833	1	25	20.5833	3.66667	1.75	1.10958	4.08125	8.625	37.9167	3.66667	0.2575	9.375	5.91667	3.58333	5	0.125	1.7984	919.963
39	Ethiopia	G39	NLLP-CPC-07-127	60	83	76.9675	10.5583	1.08333	24.5833	26.2917	4.04167	2.925	1.15542	4.02042	7.70833	47.0833	5.29167	2.42833	11.65	3.08333	2.27083	5	0.0333333	2.01325	678.162
40	Ethiopia	G40	ACC-211-440-A	54.75	78	63.725	10.4938	1	24.7917	18.25	3.79167	2.25	1.025	4.69292	8	38.5417	3.16667	0.370417	8.75	1.66667	4.33333	5	0.2125	3.33333	1277.21
41	Ethiopia	G41	ACC-211-440-B	57	86.5	75.45	10.3925	1	25.4167	23.1667	3.41667	3.08333	1.51875	7.75667	9.91667	39.875	8.08333	0.4325	6.375	1.08333	1.875	5	0.325	2.09122	715.478
42	Ethiopia	G42	ACC-221-727	54.25	78	81.7	10.6454	1	27.9167	22.9583	3.16667	2.04167	1.3025	4.99	10.625	26.75	3.25	0.220833	7.75	1.25	1.75	5	1.10833	4	719.963
43	Ethiopia	G43	NLLP-CPC-104	57	74.5	55.2675	11.2271	1	29.375	18.9167	3.75	2.66667	1.34667	5.4825	8.08333	38.75	7.25	0.562917	5.91667	3.33333	2.5625	4.58333	5	2.64907	1349.34
44	Ethiopia	G44	NLLP-CPC-103-A	51.5	77.5	83.2175	11.3367	1.08333	22.5	24	3.5	2.25	1.44583	5.17583	7.95833	48.1667	7	0.461667	10.2917	1.54167	2.16667	5	0.516667	1.33333	1395.99
45	Ethiopia	G45	NLLP-CPC-103-B	47.75	70.25	56.9	12.5558	1	22.0833	20.8333	3.66667	2.91667	1.50917	4.5025	8.91667	40.4167	3	0.34875	10.25	1	2.75	5	0.833333	1.74581	1031.69
46	Ethiopia	G46	NLLP-CPC-07-41	58.75	81	59.75	12.0762	1	23.9583	17.25	4.20833	1.33333	1.515	4.1725	7.29167	39.1667	8.54167	0.440833	12.125	2.91667	1.91667	5	0.691667	3.75952	338.235
47	Ethiopia	G47	NLLP-CPC-102	54.5	81.25	82.1	10.5942	1	25	19.75	3.25	2.41667	1.09292	4.895	5.75	39.0417	7.29167	0.560417	9.16667	3.25	3.625	6.25	0.45	2.45833	797.647
48	Ethiopia	G48	NLLP-CPC-122-A	56	82.5	75.4675	12.5225	1.08333	28.75	17.0833	4.5	2.75	1.35583	4.28583	7.29167	36.0417	4.95833	0.694167	9.33333	0.833333	3.29167	5	0.85	2.4121	940.662
49	Ethiopia	G49	NLLP-CPC-122-B	56.75	82	64.65	11.9562	1.08333	30	19.125	3.375	2.10417	1.07667	3.74083	7.25	35.625	4.25	0.35125	15.8333	2.5	3.66667	3.75	1.25	1.18719	862.243
50	Ethiopia	G50	ACC-214-147-A	47	77	57.4175	9.93708	1	26.6667	22.2917	3.625	1.91	1.45708	5.29833	8.83333	43.125	4.83333	0.429167	8.41667	2.54167	3.08333	5.6875	0.625	2.06861	970.368
51	Ethiopia	G51	ACC-214-147-B	45.25	75.75	66.8675	10.085	1	27.5	25.0833	3.83333	1.99333	1.41042	5.16583	8.45833	33.75	4.29167	0.3325	10.375	2.75	3.775	6.25	1.56667	5.75	1435.77
52	Ethiopia	G52	NLLP-CPC-07-08	52.25	83.25	46.4675	11.425	1	30.4167	20	3.66667	2.91667	0.685417	4.85292	8.33333	34.4167	9	0.455833	12.8333	2.33333	2.25	6.25	7.5475	2.16449	966.765
53	Ethiopia	G53	NLLP-CPC-07-44	49.25	75.25	79.1675	10.5192	1	24.5833	15.4167	3.66667	2.5	1.63083	4.77833	7.58333	39.5833	5	0.274583	9	1.33333	1.58333	4.29685	0.258333	3.58333	765.882
54	Ethiopia	G54	NLLP-CPC-116-A	55	83.5	82.3175	11.8808	1	30	20.8333	4	3.5	2.09667	5.42625	10.25	43.3333	4.75	0.1975	12.1667	2.5	2.83333	4.58333	0.158333	2.90597	643.897
55	Ethiopia	G55	NLLP-CPC-116-B	52.5	79.25	70.5	9.6275	1	31.6667	18.9167	3.5	1.75	0.969167	4.82167	12	35	5.20833	0.314583	12.5833	3.25	2.66667	4.58333	0.591667	1.93183	331.838
56	Ethiopia	G56	NLLP-CPC-110-A	52.75	79.5	91.5	12.0717	1	26.0417	23.2083	3.45833	1.04083	1.615	5.77333	6.83333	41.4583	5.125	0.500833	3.88333	1.25	1.91667	6.25	0	1.54074	639.559
57	Ethiopia	G57	NLLP-CPC-110-B	57.75	86.5	92.4325	12.63	1	27.9167	24.7083	4.125	2.54167	1.19292	5.1175	6.33333	32.7083	6	0.594167	8.54167	2.83333	2.70833	4.16667	1.3875	1.375	630.772
58	Ethiopia	G58	NLLP-CPC-113	52.5	83	38.8	12.5575	1	26.25	25.1667	4.29167	2.625	1.30833	5.42875	9.16667	40.4167	5	0.479167	10.6667	1.54167	2.75	5	0.583333	1.83333	753.456
59	Ethiopia	G59	NLLP-CPC-117	50	74	67.55	9.805	1	26.0417	23.0417	4.08333	3.20833	1.515	5.27062	8.625	43.1667	6.08333	0.88	11.2917	1.44444	2.695	6.25	0.00833333	4.63298	952.316
60	Ethiopia	G60	NLLP-CPC-119-A	53.25	76.75	56.95	10.3992	1	23.5417	14.2083	4.41667	2.08333	0.8525	4.8175	8.08333	37.3333	4.875	0.64	9.91667	1.83333	2.58333	5	0.0416667	2.375	866.066
61	Ethiopia	G61	NLLP-CPC-119-B	56	79.5	98.5325	10.1542	1.08333	28.75	18.9167	5	2.29167	1.36167	6.16875	8	53.75	5.58333	0.494167	11.375	9.35083	2.66667	5.625	0.375	3.00147	461.103
62	Ethiopia	G62	NLLP-CPC-114	52.25	77.75	59.4675	10.9692	1.08333	28.3333	17.1667	3.41667	2.33333	0.84625	5.3575	9.75	35	8.66667	0.613333	7.91667	1.25	3.8325	4.66667	0.633333	0.541983	1286.88
63	Ethiopia	G63	NLLP-CPC-07-15-A	51.25	78.5	92.6825	10.09	1	24.1667	17.8333	3.08333	2.66667	1.22583	5.68	7.08333	41.4583	2.91667	0.4325	9.20833	3.75	2.375	2.91667	0.5	2.41667	535.882
64	Ethiopia	G64	ACC-241-761-A	52.75	80	57.4	9.89917	1	20.4167	17.9167	3	2.5	2.03333	4.9025	7.54167	37.7083	5.5	0.421667	13.6667	1.5	2.75	4.58333	0.875	5.49917	585.846
65	Ethiopia	G65	NLLP-CPC-121	50.25	77.5	61.25	11.0692	1	25.625	15.4167	4.29167	1.75	1.91958	5.215	8.58333	33.75	3.5	3.95167	12.0833	1.91667	1.875	5	1.68512	2.46784	347.279
66	Ethiopia	G66	NLLP-CPC-123	51.75	77.5	72.4675	11.4067	1	23.75	14.875	4.20833	2	1.14667	5.5225	9.91667	47.9583	6.45833	0.395	16.5	5.5	4.5	5	0.525	2.51277	1073.82
67	Ethiopia	G67	NLLP-CPC-109-A	52.25	79.5	89.4825	10.6158	1	29.1667	16.4167	4.16667	1.95833	1.07667	5.97542	6.25	43.5833	4.29167	0.469167	8.75	1.25	3.5	5	0.316667	2.29881	979.669
68	Ethiopia	G68	NLLP-CPC-109-B	52	81.75	65.2325	12.8342	1	26.4583	12.9167	4.8	2.54167	1.32167	5.43792	8.41667	36.875	7.04167	0.762083	10.9583	1.75	1.95833	5	0	2.66667	497.574
69	Ethiopia	G69	NLLP-CPC-107	46.5	77	75.7825	11.5804	1	24.7917	18.3333	4.625	2.58333	1.07542	5.28	9.625	42.375	7	0.600833	11.9583	0.916667	3.125	6.25	0.566667	3.83333	1350.85
70	Ethiopia	G70	ACC-211-446-A	51.5	80.25	68.6675	12.8742	1	29.375	23.3333	3.5	3.08333	3.40958	5.8325	9.04167	36.25	5	0.3875	10.4167	2.25	2.08333	5	0.4	6.08333	1308.49
71	Ethiopia	G71	ACC-211-446-B	52.25	78.25	57.5675	10.02	1	27.0833	16.3333	3.75	3.25	1.3025	5.50833	7.20833	39.9167	8.41667	0.525833	8.54167	3.75	1.83333	4.58333	0.9125	5.33333	733.676
72	Ethiopia	G72	NLLP-CPC-07-50	47.25	78	75.785	9.01417	1	25.2083	16.25	4.04167	3.33333	1.26167	5.27083	5.75	38.125	6.58333	0.299167	11	1.08333	1.16667	5	0.997143	4.06373	800.441
73	Ethiopia	G73	NLLP-CPC-07-30-C	52.25	76.25	51.5	11.7325	1	26.25	24.25	5.16667	2.25	1.02	4.31333	7.95833	34.5833	6.25	0.52375	10.6667	0.916667	1.66667	3.75	0.758333	3.41938	798.309
74	Ethiopia	G74	NLLP-CPC-07-22	55.5	77.25	65.9	9.61958	1	26.25	17.3333	3.08333	1.08333	1.62583	3.73125	8.95833	37.7083	6	0.594167	12.625	3.25	2.58333	6.25	0.308333	2.32666	527.243
75	Ethiopia	G75	NLLP-CPC-07-61-A	50.75	75.25	84.5	11.1687	1	30.8333	32.5408	4.625	2.625	1.05792	5.86167	6.66667	39.3333	3.75	0.517083	14	4.33333	1.625	5.625	0.191667	4.30281	1051.8
76	Ethiopia	G76	MCP-23-A	55.5	76.5	79.24	8.95583	1	28.9583	16.4583	3.875	1.33333	1.6675	4.1075	12.9592	40	3.83333	0.767917	13.7333	0.916667	2.75	6.25	0.120833	2.70833	1442.57
77	Ethiopia	G77	MCP-23-B	51.5	75.75	70.0075	9.07375	1	25.8333	19.375	4	4.41667	2.14	4.63958	8	36.4583	5.91833	0.2025	9.91667	0.708333	4.375	4.58333	0.25	3.125	1028.53
78	Ethiopia	G78	MCP-23-C	57.25	78.25	74.9325	11.1883	1	28.9583	19.4583	3.75	2.33333	1.44083	3.96208	7.58333	29.0833	5.29167	0.276667	8.5	2.125	1.5	5	0.1	2.5	980.588
79	Ethiopia	G79	NLLP-CPC-07-65	53.5	78	85.15	10.9558	1	23.75	19.9583	3.54167	1.79167	1.50208	6.1275	8.33333	44.5833	4.95833	0.517083	12	2.33333	2.83333	5	0.15	2.16667	394.338
80	Ethiopia	G80	NLLP-CPC-07-67-C	58.5	81.25	64.3	11.3837	1	29.375	14.8333	3.75	2.375	1.1275	5.30667	6.29167	41.25	6.58333	0.2625	8.87417	1.95833	2.79167	5	1.08333	2.64754	538.162
81	Ethiopia	G81	NLLP-CPC-07-67-B	55.5	78	90.9675	12.2125	1	27.0833	19.0833	5.08333	2.75	0.829167	4.69292	9.16667	36.25	3.625	1.13375	9.29167	11.3333	2.75	6.25	0.475	2.32714	1430.26
82	Ethiopia	G82	NLLP-CPC-07-19-B	54.75	73.75	81.85	9.09458	1	24.1667	20.875	3.875	2.16667	1.11625	4.48375	9.91667	38.125	5.75	1.315	13.75	8.83417	2.45833	5	0.15	1.92742	794.375
83	Ethiopia	G83	NLLP-CPC-07-20-B	57.75	82.75	81.75	10.3133	1	25.8333	18.1667	4.33333	2.16667	4.11792	6.47542	7.625	34.5833	7.83333	0.515833	11.5833	1.20833	0.5	5	1	1.05654	1102.24
84	Ethiopia	G84	NLLP-CPC-07-95-A	52.75	80.75	73.6	11.9842	1	24.5833	13.9167	4.16667	2.08333	1.6125	4.68417	9.25	44.1675	5.5	1.2925	22.6667	1.16667	2.91667	4.58333	0.666667	1.73442	1116.69
85	Ethiopia	G85	NLLP-CPC-07-95-B	56	79	102.662	10.8488	1	22.2917	20.5833	3.41667	2.125	1.79167	4.79875	8.04167	40	5.83333	0.295833	8.875	1.66667	2.66667	3.33333	0.275	1.91667	905.735
86	Ethiopia	G86	NLLP-CPC-07-06	54	78.75	59.8675	10.7092	1	28.9583	16.0833	3.5	2.79167	1.57833	5.36792	8.375	37.2917	6.70833	0.197917	5	1.83333	3.66667	6.25	0.45	2.375	696.029
87	Ethiopia	G87	ACC-211-384-A	54.5	76.5	79.0175	10.4425	1	26.6667	18.25	3.58333	2.33333	1.325	4.93667	14.875	39.1667	4.29167	0.372917	10.9167	2.41667	1.83333	6.25	1.25	4.75	1255.81
88	Ethiopia	G88	NLLP-CPC-07-91	49	70.75	44.9825	11.1366	1	27.0833	19.5417	4	2.91667	1.57958	5.00875	7.91667	42.2917	8.04167	0.507917	9.41667	4.25	2.91667	5	0.375	2.67417	957.647
89	Ethiopia	G89	NLLP-CPC-07-100	54	78.75	83.3	11.2567	1	30.4167	19.75	3.25	2.91667	1.41	4.245	8.29167	29.625	4.83333	0.3125	8.29167	9.33417	2.5	4.58333	0.3125	1.86191	1470.55
90	Ethiopia	G90	ACC-211-436-A	54.25	77.5	73.835	10.2733	1	25.8333	17.75	3.25	2.6675	1.07083	6.33	8.66667	38.75	7.58333	0.455417	12.8333	2.16667	2.83333	5	0.791667	2.76083	995.037
91	Ethiopia	G91	ACC-211-436-B	57	78.25	61.15	9.00542	1	30.4167	19.5417	3.5	1.75	0.787917	5.63042	6.91667	33.5417	5.125	5.1225	10.0417	1.25	3.33333	5	0.35	3.16667	757.61
92	Ethiopia	G92	NLLP-CPC-07-87	55.25	76.25	75.1	8.95875	1	28.9583	17.125	3.125	2.04167	0.934167	4.16458	5.91667	40	4.75	0.435417	6.25	3.16667	2.26917	5	0.316667	2.41667	428.971
93	Ethiopia	G93	NLLP-CPC-07-20	56.5	86.5	110.35	11.52	1	27.5	23	4.04167	1.79167	1.1325	5.60125	8.875	45.2083	4.70833	0.236667	6.33333	1.45833	3.16667	5	0.5	2.125	946.949
94	Ethiopia	G94	NLLP-CPC-07-92	53	74	66.5675	9.39917	1	27.0833	19.8333	2.91667	1.83333	1.33917	3.92667	10.75	34.5833	6.33333	0.28375	4.4725	2.58333	1.95833	5	0.425	4	672.684
95	Ethiopia	G95	NLLP-CPC-07-71	53.75	74.75	69.025	8.09	1	27.5	18.9583	3.29167	2.08333	1.81125	3.98708	6.95833	33.4167	5.58333	1.97708	11.5	3.83333	2.425	6.25	0.275	1.625	947.574
96	Ethiopia	G96	NLLP-CPC-07-93	51.25	76.75	67.215	8.96	1	26.25	24.375	4.125	2.29167	1.2075	4.44708	6.83333	32.7083	6.20917	0.359167	7.75	2	1.95833	6.25	0.453333	2.83333	578.64
97	Ethiopia	G97	NLLP-CPC-07-80	49.75	76.25	77.3325	8.82833	1	22.5	18.5417	3.58333	2.16667	1.34042	6.27583	10.1667	36.8333	5.91667	0.5675	7.75	1.375	4.16667	5	0.195833	1.43068	821.287
98	Ethiopia	G98	NLLP-CPC-07-86	54.75	76.5	68.1675	10.805	1	28.125	16.3333	2.70833	2.29167	1.71167	5.64875	7.625	30.2083	4.29167	3.97958	12.625	8.82917	3.54167	5	0.2375	0.323496	651.949
99	Ethiopia	G99	NLLP-CPC-07-06-B	53	79.5	66.15	11.2004	1	28.3333	18.75	3.375	1.66667	1.20708	4.00958	7.58333	38.3333	7.41667	0.371667	11.5458	2.54167	2.16667	5	0.075	3.05731	683.346
100	Ethiopia	G100	NLLP-CPC-07-91-A	50.25	77	56	9.47667	1	27.0833	17.6667	3.5	2.58333	1.64292	4.83125	7.25	36.0417	6.16667	0.41875	11.0833	3.41667	1.91667	6.25	0.383333	2.20833	724.449
101	Ethiopia	G101	NLLP-CPC-07-91-B	52.25	76.75	74.05	10.0283	1	26.6667	19.5833	3	2.16667	1.46083	4.82458	7.41667	36.25	5.25	0.365	27.9167	3.83333	2.25	5	0.320833	1.83333	758.971
102	Ethiopia	G102	NLLP-CPC-07-79	54	79.25	81.715	11.4896	1	23.3333	20.75	4.25	2.16667	0.945833	4.63458	10	37.2917	4.625	0.583333	6.10833	1.5	1.75	6.25	0.05	3.16667	1364.56
103	Ethiopia	G103	NLLP-CPC-07-96	52.5	75.75	76.1475	11.7425	1	26.875	20.3333	3.83333	2.79167	0.662917	5.71625	7.5	39.9583	6.16667	0.394167	7.70833	0.833333	3.66667	5	0.2	1.42302	641.25
104	Ethiopia	G104	NLLP-CPC-07-92-A	51	76.5	79.15	10.5625	1	30.4167	16.9583	5.125	2.75	0.850833	5.45833	6.45833	42.7083	4.625	0.576667	5.16667	1.5	2.91667	5.625	0.416667	0.933937	989.706
105	Ethiopia	G105	NLLP-CPC-07-92-B	52	76	71.3325	11.9937	1	30.2083	16.5833	4.625	2.16667	1.24792	5.6125	6.5	52.5	5.16667	0.326667	9.66667	1.5	2.66667	6.25	0.791667	1.65961	1638.68
106	Ethiopia	G106	NLLP-CPC-07-81	54.25	75.75	92.65	10.6508	1	28.75	16.25	4.33333	2.83333	1.10333	6.00833	14.585	40	5.75	0.37875	13.2083	2.83333	3.04167	6.25	0.35	2.06363	476.36
107	Ethiopia	G107	NLLP-CPC-07-99	56.5	80.75	68.6	12.7575	1.08333	25.625	19.6667	3.33333	2.79167	0.8875	4.965	8.91667	40.2083	5.41667	0.304167	8.83333	1.25	2.58333	4.29083	0.75	3.70051	695.257
108	Ethiopia	G108	NLLP-CPC-07-94-A	52.75	77	69.9	10.4262	1	25.8333	21.2083	3.75	4.45833	0.92	5.01667	8.70833	40.4583	6.08333	0.397917	12.5	2.375	2.16667	5.625	0.691667	4.625	1075.74
109	Ethiopia	G109	NLLP-CPC-07-76	56.5	76.5	47.675	8.66917	1	42.5008	15.6667	3.25	1.75	1.82667	4.86917	7.58333	39.1667	6.08333	0.484583	8.5	0.958333	3.29167	5	0.216667	3.5	716.103
110	Ethiopia	G110	NLLP-CPC-07-87-A	52	69.25	68.0075	9.42833	1	24.1667	18.2083	4.54167	1.91667	1.6925	4.325	8.29167	37.4583	7.83333	0.58125	13.7917	5.41667	2.25	3.75	0.266667	2.5	523.64
111	Ethiopia	G111	NLLP-CPC-07-87-B	57.75	79.5	77.25	11.7779	1	28.5417	14.0833	3.125	2.04167	0.905417	6.13417	12.0417	42.0833	4.66667	0.495833	9.41667	1.625	2.03833	5	0.375	2.14189	1096.36
112	Ethiopia	G112	NLLP-CPC-07-81-A	52.75	74	82.625	9.2225	1	31.25	16.3333	4.45833	2.25	0.9725	5.32875	7.54167	41.875	6.08333	0.310833	14.125	2.66667	1.16667	5.41667	0.0791667	3.16667	993.309
113	Ethiopia	G113	NLLP-CPC-07-81-B	50	73.75	53.8	14.0025	1	24.7917	19.7917	3.54167	2.33333	1.3425	4.905	6.75	30.4167	6.66667	0.974167	11.125	1.91667	1.75	5.20833	0.483333	2.75	1023.35
114	Ethiopia	G114	NLLP-CPC-07-81-C	47.5	74.25	61.3325	9.51167	1	24.7917	31.875	3.41667	1.83333	1.25167	4.755	8.91667	38.125	5	0.620833	6.41667	2.66667	2.75	6.25	0.6375	5.83333	1168.16
115	Ethiopia	G115	NLLP-CPC-07-70	51	75.75	75.8825	8.33708	1	22.5	15.4167	2.83333	1.5	0.967917	6.11458	6.5	34.3333	6.33333	0.469583	7.70833	5.66	3.33333	6.25	0.558333	1.91667	624.301
116	Ethiopia	G116	NLLP-CPC-07-73	52.25	75.75	67.0075	10.9046	1	28.9583	13.5833	3.58333	2.25	1.3225	4.47417	8	35.4167	4.08333	0.751667	10.0833	1.66667	2.83333	4.58333	7.50833	1.01526	757.463
117	Ethiopia	G117	NLLP-CPC-07-74	47	74.75	67.3425	10.9171	1	28.125	17.5	4.16667	2.41667	1.45	5.1025	7	35.2083	4.54167	2.17958	9.75	0.833333	2.25	6.25	0.791667	2.74945	616.618
118	Ethiopia	G118	NLLP-CPC-07-62	57	82.75	94.7	10.3604	1	23.75	16.5417	3.58333	3.08333	1.21208	5.5075	8.25	37.9167	2.33333	0.25875	10.25	1.5	3.5	5	0.55	2.33333	400.699
119	Ethiopia	G119	NLLP-CPC-07-54	57.5	78.5	83.0325	10.3592	1	31.4583	15.875	4.95833	2.33333	1.37792	6.63917	8.83333	48.9583	4.75	0.301667	6.75	2.75	2.08333	3.75	0.25	2.08333	671.801
120	Ethiopia	G120	NLLP-CPC-07-53-A	52.25	79.5	83.5825	13.6912	1	27.2917	16.625	4.33333	2.29167	1.05875	4.45083	8.125	35.8333	5.79167	0.7075	10.8333	3.20833	2.20833	5	0.841667	2.58681	295.809
121	Ethiopia	G121	NLLP-CPC-07-53-B	59	81	96.25	13.7396	1	26.4583	16.6667	3.41667	2.70833	1.10333	4.20708	6.70833	38.125	6.08333	0.372917	18.375	3.75	2.3825	4.08333	0.204167	3.41667	667.132
122	Ethiopia	G122	NLLP-CPC-07-26-A	52.75	74.75	71.7825	11.9579	1	22.2917	22	3.70833	2.54167	1.49167	4.745	6.83333	38.9583	5.33333	0.216667	8.54167	3.07917	2.95833	5	0.0875	5.75	705.331
123	Ethiopia	G123	NLLP-CPC-07-36	54.25	77.5	97.8	11.4825	1	29.7917	14.2083	4.33333	2.70833	1.18208	4.185	6.25	36.2917	5.25	0.208333	8.29167	1.33333	4.08333	5.83333	0.0833333	3.06258	574.522
124	Ethiopia	G124	NLLP-CPC-07-19	56.5	79.75	69.6175	12.1551	1	26.4583	15.2083	3.5	2.875	1.45417	4.475	7.04167	41.25	4	0.365833	11.1667	1.75	3.66667	5.41667	3.1	0.625	1698.6
125	Ethiopia	G125	ACC-215-821	57	84	84.35	11.6554	1	25.4167	22.5	5.25	2.85167	1.54958	5.18667	6.45833	35.4167	4.38167	0.4375	10.4167	1.91667	2.25	5.25	0.125	4.025	1189.67
126	Ethiopia	G126	NLLP-CPC-07-38-A	55.25	79.75	73.8825	12.0242	1	27.9167	20.25	3.5	3.31	1.56292	5.80583	7.41667	31.0417	5.75	0.3275	9.875	3	2.53	4.29685	0.333333	1.28308	596.801
127	Ethiopia	G127	NLLP-CPC-07-38-B	56.75	74.75	75.75	9.89708	1	23.3333	17.6667	3.66667	2.25	1.78625	5.05083	9.16667	34.1667	4.41667	0.268333	8.58333	2.83333	1.5	5.41667	0.6575	1.5	509.412
128	Ethiopia	G128	NLLP-CPC-07-38-C	55.25	77.75	62.9	8.69625	1	24.375	17.625	4.70833	3.25	1.40167	4.21417	7.33333	42.2917	3.66667	0.378333	11.75	2.41667	1.58333	5	0.8625	5	685.551
129	Ethiopia	G129	NLLP-CPC-07-38-D	50	72	55.675	10.4642	1	25.2083	23.8333	3.79167	2.70833	1.37208	5.2725	8	40.8333	6.33333	0.475	8.41667	4.25	1.5	3.75	0.441667	5.25	697.941
130	Ethiopia	G130	ACC-223-402	53.5	74.75	66.95	11.29	1	24.375	21.5	4	2.33333	1.09667	4.82833	7.70833	38.9167	6.95833	0.528333	16.1258	1.16667	3	6.25	1.28333	1.33333	696.544
131	Ethiopia	G131	NLLP-CPC-07-25-A	52	74.5	62.475	9.14667	1	25	16.0833	3.83333	2.625	1.18583	5.04417	8.58333	38.125	3.625	0.700833	7.45833	7.6825	2.41667	4.58333	5.35	2.72876	1077.68
132	Ethiopia	G132	NLLP-CPC-07-25-B	50.25	75	69.9825	11.1879	1.125	24.1667	18.5417	4.75	1.75	1.30958	4.42083	8.04167	40	4	0.46	9.95833	3.375	2.75	5.41667	0.75	5.875	1297.98
133	Ethiopia	G133	ACC-216-747	56.5	79	75	13.6162	1	28.3333	28.3333	5.375	2.625	1.47583	5.12708	5.75	38.125	11.1667	0.65	9.08333	1	2.20833	5	1.15	6.625	1426.95
134	Ethiopia	G134	NLLP-CPC-07-37-A	58.75	79.25	67.5175	10.0821	1	28.3333	18.5417	3.875	1.75	1.47	6.13625	7.04167	34.5833	5.25	0.345	9.9375	1.25	2	4.58333	0.8125	1.91667	684.449
135	Ethiopia	G135	NLLP-CPC-07-37-D	53.5	79	60.3325	11.0854	1	22.9167	21.0833	4.45833	2.08333	1.23125	4.925	8.16667	32.0833	5.54167	0.525417	9.08333	1.25	2.08333	4.58333	0.891667	2.29026	616.14
136	Ethiopia	G136	ACC-208-776	52.25	79.5	64.1	10.6183	1	27.0833	25.9167	4.375	2.66667	1.00792	3.87208	8.625	40.625	3.20833	0.225833	8.41667	2.33333	1.75	6.25	0.4125	2.91667	860.662
137	Ethiopia	G137	NLLP-CPC-07-37	53.25	78.5	70.75	11.6971	1	27.7083	19.9583	3.83333	2.29167	1.71042	5.72333	8.91667	41.6667	6.66667	0.543333	8.54167	4.08333	2.16667	5	0.5	5.75	1039.3
138	Ethiopia	G138	NLLP-CPC-07-21-A	57	80.75	76.5825	11.4079	1	26.6667	18.3333	4.29167	2.79167	1.24333	6.6925	7.83333	41.2083	7.29167	0.2775	9.45833	2.54167	3.75	5	0.525	5.125	1127.39
139	Ethiopia	G139	NLLP-CPC-07-21-E	55.25	80	73.5675	11.5721	1	29.375	18.5417	3.70833	2.58333	0.734167	4.83083	7.91667	40	4.79167	0.4225	10.75	0.833333	2.91667	3	1.42083	2	377.059
140	Ethiopia	G140	NLLP-CPC-07-21	55.25	77.25	85.8325	10.9896	1	22.7083	20.25	3.20833	3.875	3.19917	5.11833	8.41667	41.0417	4.16667	0.405	11.5833	3.625	1.54167	5	0.316667	5.375	706.581
141	Ethiopia	G141	NLLP-CPC-07-93-A	50.75	77.75	70.415	10.3829	1	28.5417	18.125	3.45833	2.375	4.2075	3.8175	8.25	33.1667	4.25	0.415833	9.75	3.125	1.33333	4.16667	0.5375	2.70833	1204.56
142	Ethiopia	G142	NLLP-CPC-07-93-B	57.75	77	87.865	11.6371	1	27.2917	17.2083	3.5	3.20833	1.80292	4.4275	8.16667	35.2083	4.875	0.680833	10.875	3.16667	2.95833	5	0.425	2.7506	373.235
143	Ethiopia	G143	NLLP-CPC-07-90-A	53.75	77	100.267	10.1975	1	25.4167	19.7083	3.58333	3.125	2.16125	4.7825	6.54167	43.75	7.5	0.38	7.54167	2.625	3.25	5	0.125	2.375	517.574
144	Ethiopia	G144	NLLP-CPC-07-90-B	50.5	78.5	63.6825	9.9	1	25.8333	21.3333	3.5	3.25	1.61667	4.84792	8.41667	38.75	4.875	1.98833	9.20833	1.5	1.41667	6.875	0.525	2.978	668.86
145	Ethiopia	G145	NLLP-CPC-07-128	49	73.5	47.9	8.9275	1	26.875	16.0417	4.375	2.25	0.845833	6.95583	6.91667	38.9583	4.20833	0.352917	10.4583	3.16667	2.41667	5	1.32917	2.32512	767.5
146	Ethiopia	G146	NLLP-CPC-07-129	45.5	73.25	45.45	10.3613	1	25.625	18.375	3.54167	1.58333	1.84708	4.73583	6.875	38.125	5.33333	0.720417	5.43083	1.73333	2.83333	5	0.351667	2.47838	688.125
147	Ethiopia	G147	NLLP-CPC-07-66-B	55.25	87	72.6	12.6258	1	23.9583	25.0417	3.83333	1.625	1.42833	5.21417	8.66667	29.75	3.16583	0.339583	13.2083	1.08333	2.41667	3.75	0	3.375	838.529
148	Ethiopia	G148	NLLP-CPC-07-88-A	54.25	75.75	63.05	12.0217	1	21.875	21.25	4	2.25	1.48042	4.38042	11.9167	39.3333	4.16667	0.876667	10.5833	3.16667	2.75	6.25	0.375	1.58333	333.787
149	Ethiopia	G149	NLLP-CPC-07-88-B	50.5	72.75	69.575	12.6062	1.125	45.4167	23.125	4.20833	3.125	1.24917	4.60083	8.75	39.375	5.08333	0.605833	11.9167	1.75	2.83333	5	0.25	2.5	868.346
150	Ethiopia	G150	NLLP-CPC-07-88-C	49	74.5	80.4175	9.87083	1	23.9583	18.5417	3.70833	2	1.1725	4.93167	10.3333	43.5417	5.41667	0.541667	9.75	1.33333	2.08333	4.58333	0.758333	1.2689	654.522
151	Ethiopia	G151	DOSS	45.75	73.25	64.2675	10.425	1	32.0833	18.2917	3.83333	1.75	1.4125	5.43083	9.83333	36.25	9	0.22	9.70833	3.33333	1.5	5.625	0.391667	4.22658	625
152	Ethiopia	G152	NLLP-CPC-07-130	51.75	79.75	81.3325	10.0992	1	25.4167	20.9167	4.0575	5.4125	1.58875	5.64958	7.58333	34.4167	3.5	0.465833	10.625	1.25	1.08333	5	1.25	2.16899	783.088
153	Ethiopia	G153	NLLP-CPC-07-131	54.5	79.75	63.8	11.0542	1.08333	21.25	23	4.91667	2	1.43417	4.81833	6.91667	41	3.41667	1.455	10.1667	3.25	3.7125	5	0.125	3.61842	565.037
154	Ethiopia	G154	NLLP-CPC-07-132	51.25	78.5	70.85	12.2625	1	21.0417	21	3.45833	2.29167	1.02333	4.56458	6.16667	35.8333	4.45833	3.2575	13.25	5.63333	2	6.25	0.65	2.125	678.162
155	Ethiopia	G155	NLLP-CPC-07-133	53	77.5	74.05	13.9142	1	29.1667	17.2917	3.625	2.04167	1.55708	3.9	8.875	40.2083	4.58333	0.462917	11.5	3.625	2.5	5	0.125	1.83333	915.037
156	Ethiopia	G156	NLLP-CPC-07-134	45.25	73.75	63.85	9.58083	1	27.5	18.5833	3.75	2	0.937917	4.97708	7.83333	32.75	6.33333	0.99	10.3333	2.08333	1.66667	4.66667	0.15	2.65233	832.831
157	Ethiopia	G157	NLLP-CPC-07-135	51.5	76.75	81.9675	11.7875	1.08333	27.5	20.5417	3.07218	1.94611	1.04625	5.29583	7.04167	50.2092	5.5	0.749583	11.625	1.27	2.16667	5.625	0.125	1.875	541.838
158	Ethiopia	G158	NLLP-CPC-07-136	49.5	76.5	72.5825	11.8304	0.916667	29.1667	24.5	4.45833	2.375	1.03958	5.33292	8.58333	53.75	5.5	0.397917	11.125	2.83333	2.08333	5	0.1625	3.66667	486.875
159	Ethiopia	G159	NLLP-CPC-07-137	54.25	80.5	68.4825	11.2317	1	26.25	24.3333	3.33333	3.91667	1.3475	5.54375	5.95833	46.4167	5.58333	0.478333	9	2.75	4.41667	6.25	5	1.9847	912.647
160	Ethiopia	G160	NLLP-CPC-07-138	54.5	79.25	69.85	10.4671	1	27.9167	11.7083	3.375	2.45833	1.61917	5.99167	7.49333	37.0833	5.54167	0.16	7.375	1	2.83333	4.50083	0.4125	4.05846	620.809
161	Ethiopia	G161	NLLP-CPC-07-139	49.25	77.5	55.9675	9.54625	0.916667	21.25	17.875	3.125	2.25	1.48167	5.41375	5.91667	37.125	6.33333	0.644167	8.77083	1	2.91667	2.91667	0.62	1.20833	837.426
162	Ethiopia	G162	NLLP-CPC-07-140	56.25	81	72.385	10.805	1	28.125	33.3342	3.45833	2.91667	3.54875	5.76	7.5	47.5	4.75	3.41958	11.2917	0.666667	2.50417	5	0.0416667	3.375	1042.02
163	Ethiopia	G163	NLLP-CPC-07-141	55	75	79.665	11.5579	1	25.8333	15.7083	3.20833	2.04167	1.65417	4.41292	6.29167	30.5	5.91667	0.348125	10.0833	1.63333	2.66667	5	0.708333	2.5	877.39
164	Ethiopia	G164	NLLP-CPC-07-142	56	87.25	76.19	11.4229	1	27.0833	25.4583	3.08333	1.91667	1.6875	4.53208	7.79167	33.75	5.79167	0.455417	8	1.33333	3	5	0.354167	1.21018	920.037
165	Ethiopia	G165	NLLP-CPC-07-143	48.5	77.5	51.3	10.9275	1	27.0833	21.25	4.25	2.875	1.31917	5.545	8.79167	42.5	4.58333	0.5125	12.0833	1.91667	2.9125	4.09722	0.00833333	3.125	868.64
166	Ethiopia	G166	NLLP-CPC-07-144	55.75	80	69.465	14.1783	0.916667	27.0833	18.25	3.5	1.79167	1.21917	5.16917	7.08333	39.5833	5.04167	0.38	10.4167	4.16667	1.875	5	0.5	1.84486	941.471
167	Ethiopia	G167	NLLP-CPC-07-145	50	76.25	53.89	9.88833	1	28.5417	25.7083	4.45833	1.75	1.5775	7.49833	7.95833	38.3333	4.5	0.306667	8.70833	1.75	3.625	4.58333	0.415	1.875	500.404
168	Ethiopia	G168	NLLP-CPC-07-146	53.5	77.25	49.9175	12.88	1	24.5833	18.7917	3.04167	1.5	2.025	4.75625	14.9167	37.9167	7.66667	0.59175	10.1667	1.33333	2.41667	5	0.4625	2.18145	1272.68
169	Ethiopia	G169	NLLP-CPC-07-147	56.25	75.5	52.6325	11.8025	1	23.9583	19.9583	3.625	3.33333	1.67958	7.20667	9.125	39.1667	5.125	0.375417	7.625	1.16667	2.70833	4.58333	0.241667	1.28221	829.926
170	Ethiopia	G170	NLLP-CPC-07-148	56	73.75	47.1825	11.4025	1	27.0833	15.2917	4.5	2.375	0.954167	4.57208	8.91667	46.875	2.75	0.323333	10.25	4	1.91667	7.08417	0.458333	6.58333	909.816
171	Ethiopia	G171	NLLP-CPC-07-149	53.25	78.5	71.495	11.8717	1	25.8333	18.7625	4.25	2.16667	1.315	6.12917	8.91667	43.375	4.95833	0.433333	7.91667	2	1.45833	4.625	0.9375	2.0188	1600.66
172	Ethiopia	G172	NLLP-CPC-07-150	57.5	82	61.35	12.9333	1	29.375	37.6167	3.95833	2.66667	1.6975	7.47333	10	42.5	4	0.539583	10.0833	2.58333	2.75	5.83333	4.15	5.875	1636.73
173	Ethiopia	G173	NLLP-CPC-07-151	57.75	82.5	66.6	11.4542	1	27.7083	18.625	4.125	2.41667	1.25958	5.57583	7.54167	37.7083	8.04167	0.384167	12.9167	5.33167	3.16667	6.25	0.6	1.89167	365.331
174	Ethiopia	G174	NLLP-CPC-07-152	51.75	80.25	61.3325	10.0596	1	20.2083	15.625	3.20833	2	1.72208	4.80125	10.25	41.25	3.16667	0.502917	8.33333	3	1.58333	4.5	1.01667	1.53671	1056.25
175	Ethiopia	G175	NLLP-CPC-07-153	54.25	81	80.2325	10.3771	1.125	28.5417	23.4583	3.08333	1.83333	1.59583	4.68875	6.29167	40.8333	6.83333	0.435417	10.25	0.75	2.275	4.58333	0.8875	2.75	902.647
176	Ethiopia	G176	NLLP-CPC-07-154	54.5	77.75	86.2675	12.6371	1	19.1667	19	4.25	3.16667	1.38792	4.39958	8.91667	38.5833	6.16667	0.784167	10.8333	1.20833	3.5	6.25	0.816667	2.45833	965.809
177	Ethiopia	G177	NLLP-CPC-07-155	58.25	80.5	91.8	12.47	1	27.7083	25.875	4.58333	2.66667	0.729167	4.71458	6.91667	33.1667	4.25	0.591667	5.16667	1	2.17083	5	0.516667	0.424263	468.272
178	Ethiopia	G178	NLLP-CPC-07-156	52.5	79.5	67.15	13.3104	1	24.1667	34.625	3.95833	2.04167	0.79625	4.37333	7.875	35.8333	3.54167	0.395833	11.5	4.3	2.20833	5	5.1875	2.19167	1116.73
179	Ethiopia	G179	NLLP-CPC-07-157	59.25	85.5	67.55	13.17	1	38.75	22.625	4.95833	2.45833	4.03833	5.0175	8.20833	46.25	6.33333	0.685	12.2083	3.91667	2.125	3.33333	0.04	3.125	577.316
180	Ethiopia	G180	NLLP-CPC-07-158	53.75	77	76.6825	10.755	1	19.1667	19.7083	4.54167	2.375	1.36875	4.06083	6.95833	38.6667	7.41667	0.475833	13.75	1.25	1.54167	4.58333	0.958333	1.28825	351.949
181	Ethiopia	G181	NLLP-CPC-07-159	55	73.75	71.465	10.4167	1	27.5	36.0833	3.5	0.875	1.455	5.76125	9.45833	41.9167	4.54167	0.28375	9.375	2.16667	3.75	7.50083	0.15	2.55	668.566
182	Ethiopia	G182	NLLP-CPC-07-160	55.5	77	70.015	9.16542	1	21.4583	17.875	3.16667	2.54167	0.967083	5.10625	7.04167	37.5	4.5	0.415	8.41667	1.79167	1.5	5	0.520833	3.30204	1009.19
183	Ethiopia	G183	NLLP-CPC-07-161	59	80.75	61.24	10.2804	1	25.2083	22.0417	3.20833	3.25	1.53083	6.73333	6.83333	34.5833	6.375	0.330833	13.5	3.54167	3.79167	5	1.125	1.5	928.934
184	Ethiopia	G184	NLLP-CPC-07-162	59.25	87.25	67.725	12.0508	1	22.9167	22.3333	3.25	2	0.940833	4.75917	9.70833	48.75	4.41667	0.891667	21.5833	1.91667	1.75	5	0.866667	1.93509	1141.47
185	Ethiopia	G185	NLLP-CPC-07-163	55.25	79	74.075	10.8087	1	25.8333	18	4.29167	2.5	1.5925	6.18875	8.45833	50.625	6.58333	0.606667	10.5417	3.54167	3.25	5	0.53875	2.25	1293.05
186	Ethiopia	G186	NLLP-CPC-07-164	57.75	78	59.4675	10.265	1	22.5	24.7917	4.625	1.875	1.06	6.0075	9.25	38.5417	5.54167	0.5925	9.29167	1.58333	3.5	5	0.2	4.16667	654.301
187	Ethiopia	G187	NLLP-CPC-07-165	55.25	80.5	78.95	11.0987	1	24.375	17.9167	4.25	2.20833	0.767917	3.74417	14.0842	34.6667	3.08333	0.38625	10.3333	0.916667	3.33333	5	0.1025	3.58333	1406.69
188	Ethiopia	G188	ACC-233-403	56.25	78	68.2825	12.3271	1	24.375	15.9167	3.41667	2.45833	1.49708	4.63167	7	44.375	5.95833	0.352083	7.875	3.625	3.125	6.25	0.4625	3.41667	849.044
189	Ethiopia	G189	ACC-211-557	54.25	81.75	103.55	10.3942	1	25.4167	18.7083	3.83333	2	1.1075	4.16625	6.91667	45.8333	3.41667	0.5775	6.25	1	1.16667	5	1.25	4.57149	1385.37
190	Ethiopia	G190	ACC-211-441	53.5	83.25	79.4	11.6996	1	21.6667	23.75	4.25	1.41667	0.968333	5.42583	7.20833	39.1667	4	0.191667	7.1575	2.25	3.16667	5	0.166667	2.67905	757.647
191	Ethiopia	G191	NLLP-CPC-07-31	54	79.25	65.95	9.64083	1	26.25	19.1667	3.66667	3.16667	1.76542	6.17042	8.54167	27.5833	6.375	0.412917	12.1667	11.5417	2.54167	3.75	0.708333	2.33333	876.066
192	Ethiopia	G192	NLLP-CPC-07-17	49.25	78.5	69.1	11.5783	0.916667	21.6667	17.5833	3.91667	2.61833	1.69542	3.92667	6.41667	36.25	3.5	0.736667	15.2917	2.875	1.20833	5.41667	0.0625	2.62484	785.625
193	Ethiopia	G193	NLLP-CPC-07-18	52.5	76.75	68.4175	13.0208	1	21.6667	18	3.70833	2.58333	2.16917	4.16833	7.33333	38.3333	10.3325	0.535	11.125	1.16667	3.66667	5	0.55	1.27742	860.184
194	Ethiopia	G194	NLLP-CPC-07-16	56.5	78.75	78.735	11.5404	1	30.4167	14.7917	4.29167	2.79167	1.02208	3.21333	8.15	33.5417	5.16667	0.3325	8.10833	2.95833	2.64	5	0.316667	3.91667	748.971
195	Ethiopia	G195	NLLP-CPC-07-11	55.5	79.25	69.9675	11.2775	1	23.3333	17.5	4.125	2.125	0.976667	4.53833	9.41667	30.875	3.75	0.57625	9.70833	1.66667	2.33333	6.25	0.275	1.27829	680.184
196	Ethiopia	G196	ACC-228-624	56.5	83.5	90	10.8154	1	30.8333	21.5833	2.625	2.41667	1.53208	4.72125	9.33333	34.5833	3.66667	0.2775	7.875	2.70833	4.16667	5.20917	0.646667	3.41667	886.949
197	Ethiopia	G197	ACC-211-490	55.75	79.5	86.4825	11.5208	1	23.3333	20.9167	4.875	2.58333	1.09708	5.2425	7	37.25	4.83333	0.477083	14.25	1.25	2.16667	5	0.4	2.95833	694.816
198	Ethiopia	G198	ACC-211-447	51.25	77.75	76.65	10.0688	1	27.2917	16.2917	3.625	2.79167	1.55875	4.99333	9.16667	34.1667	4.16667	5.35667	7.08333	4.70833	3.33333	4.16667	0.2	2.51765	446.544
199	Ethiopia	G199	NLLP-CPC-07-28	58.25	80.75	68.85	12.7933	1	18.3333	23.9583	4.04167	0.916667	1.43333	6.11417	9.375	40	4.08333	0.409167	6.75	2.33333	2.08333	3.58333	0.2625	3	877.463
200	Ethiopia	G200	NLLP-CPC-07-28-A	55.75	88	43.575	9.54958	0.916667	25.625	16.2083	2.79167	1.66667	1.67333	4.76083	6.875	44.1667	6.66667	0.44875	11.4167	2.33333	2.58667	5	0.254167	2.88413	577.316
201	Ethiopia	G201	NLLP-CPC-07-28-B	61	80.25	80.325	9.60917	1	30.625	23.75	3.66667	2.25	1.705	4.56083	7.58333	38.125	4.83333	3.24917	11.625	2.91667	1.75	5.83333	0.6625	1.23853	1043.16
202	Ethiopia	G202	NLLP-CPC-07-166	52.5	76	57.45	9.4525	1	25	22.9167	4.16667	2.08333	1.22417	3.87667	8.41667	35	3.875	0.382083	9.375	2.75	3.49667	5	0.575	2.38333	353.86
203	Ethiopia	G203	NLLP-CPC-07-167	50.5	76.5	57.2125	13.6071	1	25.4167	25.375	4.66667	2.25	1.55167	5.65875	8.16667	38.3333	4.45833	0.762083	9.25	4.125	1.70833	5	0.534167	2.16667	614.816
204	Ethiopia	G204	NLLP-CPC-07-168	56	80.5	96.9675	11.3571	0.916667	22.0833	24.1667	4.16667	2.875	1.27792	5.40667	9.66667	34.1667	3.41667	0.329583	12.25	4	3.08333	3.75	1.4	4.5	1025.18
205	Ethiopia	G205	ACC-220-575	55	82.25	69.2325	11.0842	1	24.5833	16	4.58333	3	1.06667	3.6625	5.58333	38.5417	6.625	0.2525	9.16667	2.70833	1.94167	5.125	0.675	2.87723	584.044
206	Ethiopia	G206	NLLP-CPC-07-03-A	49.25	75.75	98.6675	10.1071	1	27.0833	15.375	3.75	1.95833	1.16833	3.96667	13.7092	49.1658	9	0.815	9.58333	2.41667	2.08333	5	0.075	2.39955	647.537
207	Ethiopia	G207	NLLP-CPC-07-03-B	52.5	77	80.1675	11.3738	1	21.875	23.125	3.95833	1.68333	0.973333	5.18875	7	40	6.66667	0.154167	20.875	1.25	1.33333	5	0.2125	1.91667	564.081
208	Ethiopia	G208	NLLP-CPC-07-02	52.75	78.25	59.225	9.73667	1	25	15.1667	3.58333	3.16667	1.3575	5.98458	10.8333	42.0417	4.58333	0.544167	8.20833	1.875	1.91667	6.25	0.6375	3.20252	517.574
209	Ethiopia	G209	NLLP-CPC-07-33	52	78.5	70.6	12.1392	1	24.5833	22.9583	3.95833	2.16667	1.28708	4.82583	6.08333	27.875	6.08333	0.4225	7.08333	1.16667	3.375	5.125	0.708333	3.18269	459.559
210	Ethiopia	G210	NLLP-CPC-07-10	52.75	78.25	63.95	10.8279	1	30.8333	17.3333	3.33333	1.94167	1.1925	3.925	6.5	39.1667	5.91667	0.21625	13.3333	1.33333	3.45833	5.625	1.0375	3.08333	1256.58
211	Ethiopia	G211	ACC-222-867	54	79.25	77.6825	11.9717	1	20.8333	14.6667	3.58333	2.33333	0.914583	4.72375	6.41667	45.2083	7.20833	0.45	8.9375	0.666667	2.58333	6.25	0.5	1.33333	1222.5
212	Ethiopia	G212	CP-EXTERETIS	51.25	78.5	82.0175	10.3113	1	27.2917	17.5417	2.79167	2.875	1.21042	5.15333	8.08333	50	5.25	0.374583	8.375	1.5	3	6.25	0.675	2.16583	580.551
213	Ethiopia	G213	NLLP-CPC-07-32-A	55.25	83.25	87.6675	11.2342	1	21.0833	15.6667	3.91667	1.16667	2.05625	4.34917	7.08333	43.0833	4.91667	0.383333	9.04167	2.08333	1.5	6.25	0.741667	2.1257	250.588
214	Ethiopia	G214	NLLP-CPC-07-32-B	52	85.75	56.2675	10.715	1	24.5833	20.7917	3.79167	2.29167	1.64167	6.23292	8.33333	37.2917	4	0.217917	10.125	4.41667	1.625	5.83333	0.941667	2.35626	347.941
215	Ethiopia	G215	ACC-211-491-A	50.25	75	82.25	9.28333	1	25.8333	17.3333	4.41667	3.33333	1.14083	4.56333	6.04167	35.7917	5.75	0.669167	11.8333	4.70833	2	4.58333	0.2625	4.58333	509.265
216	Ethiopia	G216	ACC-211-491-C	52.75	78.25	65.625	14.4425	1	23.125	20	4.79167	2.66667	1.33083	4.9825	8.20833	41.875	8.625	0.365	10.0833	3.5	2	4.41667	0	2.79881	620.699
217	Ethiopia	G217	ACC-244-804	55	77	61.975	9.78417	1	24.7917	23.5417	4.16667	2	1.27625	5.04333	8.45833	37.2917	5.91667	0.6325	8.91667	1.25	2.16667	5	0.3625	2.625	633.493
218	Ethiopia	G218	ACC-244-804-A	57	76.75	88.2325	9.76792	1	25.625	15.5417	3.66667	2.66667	1.7075	4.425	7.5	37.5	4.16667	0.449583	11.9167	1.58	2.5	6.25	0.025	2	1305.88
219	Ethiopia	G219	ACC-244-804-B	57	88	91.5925	9.17958	1	22.0833	15.7917	3.29167	2	1.06875	3.80292	6.875	36.1667	5.58333	1.66833	15.625	1.25	3.16667	5	0.45	2.50309	366.912
220	Ethiopia	G220	ACC-244-804-C	53.5	87.75	57.3	9.21958	1	26.25	15.4167	3.70833	2.625	1.43792	5.21667	7.625	40.4167	6.70833	0.416667	9.66667	3.29167	2.16667	5	0.166667	2.375	945.074
221	Ethiopia	G221	NLLP-CPC-07-169	51.5	74.75	64.55	12.2342	0.92	23.75	18.9583	4.375	3.5	1.53458	4.73792	7.41667	37.0833	5.75	0.226667	8.79167	1.5	2.41917	5	0.783333	1.42378	726.544
222	Ethiopia	G222	NLLP-CPC-07-170	51.5	77	103.218	10.8871	1	23.3333	17.7083	4.875	2.125	1.35042	4.34	6.5	42.5	7.04167	0.333333	8.33333	1.5	3.125	6.25	0.225	1.92139	830.11
223	Ethiopia	G223	NLLP-CPC-07-171	54.25	78.25	92.9325	11.9829	1	25	27.2917	6.20833	2.20833	1.725	4.23583	5.58333	31.875	4.625	0.273333	11	4.25	3.5	4.58333	0.275	2	1168.01
224	Ethiopia	G224	ACC-208-778	56.75	73.5	88.3	12.4108	1	24.1667	15.0833	3.20833	1.70833	1.34833	4.39208	9.16667	57.0833	4.08333	0.286667	10.1667	2.16667	1.5	4.58333	0.25	3.17053	891.765
225	Ethiopia	G225	ACC-216-749	57.75	80.25	72.65	11.8463	1	25.2083	14.7458	4.58333	1.91667	1.0775	7.73167	6.41667	39.5833	5.33333	2.37542	11.5833	1.5	3.5	3.75	0.125	2.75	570.588
226	Ethiopia	G226	MCP-23-D	46.5	76.75	107.7	11.1154	1.24917	27.7083	22.6667	4.08333	3	1.77208	6.36208	6.33333	44.1667	6.75	0.389583	6.91667	1.83333	2.04167	7.5	0.191667	2.75	729.963
227	Ethiopia	G227	MCP-23-E	45.75	77.25	77.1	12.7075	1	21.875	17.875	4.20833	2.29167	1.195	4.345	6.83333	42.2917	4.29167	0.822917	10.75	3.66667	3.33333	5.83333	0.291667	2.08333	421.581
228	Ethiopia	G228	NLLP-CPC-07-19	57.75	81	83.65	10.8438	1	25.2083	15.9167	3.33333	2.16667	0.918333	5.31833	9.375	58.75	3.25	0.4175	8.08333	1.33333	1.41667	5.41667	0.458333	3.16667	860.846
229	Ethiopia	G229	ACC-227-104	52	79.25	65.2175	11.6625	1	28.3333	17.4167	3.66667	2.41667	1.72792	5.43167	8.375	40.3333	4.5	0.468333	10.75	1.75	2.04167	6.25	0.291667	4.04167	882.463
230	Ethiopia	G230	NLLP-CPC-07-172	56.25	80.5	96.7175	10.7037	1	23.9583	13.9583	3.5	2.04167	1.32583	5.47	7.875	36.625	4.25	0.62	10.8333	1.125	2.625	5	0.125	3.04167	426.691
231	Ethiopia	G231	ACC-211441-B	48.075	76.75	72.6	10.0929	1	26.25	17.9167	3.66667	3	1.96417	4.16292	9.83333	37.2917	6.16667	0.42875	7.91667	2.20833	2.11917	7.5	0.220833	1.5	362.426
232	Ethiopia	G232	ACC-211441-C	46.475	77.25	64	9.28833	1	24.1667	15.625	3.5	1.91667	1.38625	5.72292	9.25	37.0833	4.33333	0.7925	19.375	2	1.66667	5	0.225	1.96421	1363.12
233	Ethiopia	G233	ACC-222890	50.5	77	54.9175	10.0846	1	22.2917	22.2083	4.20833	3.33333	1.18667	3.67333	7.54167	35.8333	4.58333	0.41875	13.9167	1.29167	3.375	5	0.291667	1.95654	494.559
234	Ethiopia	G234	ACC-235122-A	48.75	77.5	56.4325	9.73917	1.16583	24.5833	18.0833	3.54167	3.16667	0.926667	5.0975	8.58333	34.5	6.75	0.4475	10.0417	1.16667	2.94167	6.25	0.5625	2.85865	768.235
235	Ethiopia	G235	ACC-235122-B	52.75	77	56.55	11.9604	1	25.4167	24.5417	3.83333	1.29167	2.59292	5.0575	7.95833	31.6667	6.29167	0.247917	10.625	0.75	1	5	2.2725	1.73614	792.206
236	Ethiopia	G236	Dass 001	53.5	76.75	80.35	11.8113	1	26.875	26	2.25	0.916667	1.11292	6.33875	6.83333	63.1125	4.08333	0.295	10.7083	2.5	3.16667	6.25	1.16667	3	895.221
237	Ethiopia	G237	Dass 002	50.75	76.25	72.85	9.10583	1	25.8333	19.7083	4.33333	3.04167	1.09	7.23958	7.41667	38.125	5.625	0.389167	9.75	1	2.70833	5	0.491667	2.24869	788.934
238	Ethiopia	G238	Dass 005	51.25	75.25	55.575	8.84417	1	26.875	14.0833	4.16667	1.52667	1.62583	5.02458	9.83333	33.75	5	0.304167	7.83333	2.16667	1.16667	5	1.0575	2.5	1064.08
239	Ethiopia	G239	Dass 007	52.825	75	78.45	13.0842	1	29.375	15.5417	2.70833	1.27667	1.42958	7.5725	8	37.3333	4.29167	0.35875	10.75	3.79167	1.83333	3.75	0.91	2.49706	812.574
240	Ethiopia	G240	NLLP-CPC-0701	49.75	78.5	57.15	11.1387	1	25	16.875	3.45833	2.29833	1.93417	5.38542	6.5	43.75	5.04167	0.27	11.0417	5.16667	2.83333	6.25	1.375	1.78786	684.522
241	Ethiopia	G241	NLLP-CPC-0705	55.75	80.75	85.4825	11.8283	1	25.8333	24.2917	3	2.10333	1.23	4.88167	8.79167	39.5833	8.375	2.93	7.75	3.04167	2.33333	4.16667	0.233333	2.68911	1036.03
242	Ethiopia	G242	NLLP-CPC-0707	54.75	78.5	87.5	11.1042	1	31.6667	17.0833	3.66667	1.525	1.85583	4.80042	9.875	40	4.08333	0.551667	10.4583	3.33333	2.08417	5	0.456667	2.58333	1310.99
243	Ethiopia	G243	NLLP-CPC-0709	48	77.75	66.4	10.09	1	19.375	16.1667	4.375	2	1.43417	6.36083	13.5842	36.8333	4	0.307083	6.83333	0.875	2.95833	5	0.375	1.625	600.11
244	Ethiopia	G244	NLLP-CPC-07101	54.25	86	60.6	11.1312	1	22.9167	16.625	3.25	2.70833	1.35375	5.28042	9.29167	38.5417	3.125	0.406667	7.5	4.20833	2.25	4.375	0.416667	2.89629	1085.66
245	Ethiopia	G245	NLLP-CPC-0712	50.5	78	72.5	8.65958	1	25.2083	14.3333	3.29167	2.125	1.4125	3.72333	8.33333	43.5833	5.25	0.383333	8.125	1.91667	3.16667	4.16667	0.25	2.3303	896.618
246	Ethiopia	G246	NLLP-CPC-0714-A	51	81	81.35	13.4829	1	31.25	16.9583	3.70833	2.375	1.355	4.86875	8.79167	42.5	6.66667	0.19	7.50833	1.75	2.83333	4.16667	0.625	1.5529	641.801
247	Ethiopia	G247	NLLP-CPC-0714-B	53.5	81	79.5175	10.9062	1	23.75	21.75	3.33333	2.54167	1.6225	5.64417	7.08333	44.7917	4.08333	0.5075	9.9375	0.916667	1.66667	4	0.325	2.16667	604.191
248	Ethiopia	G248	NLLP-CPC-0716-A	51	79.25	104.6	10.4529	1	19.7917	17.75	7.24917	2.625	1.41375	5.8175	9	37.2917	4.125	0.518333	10.775	1	2.54167	4.58333	0.866667	2.83333	556.875
249	Ethiopia	G249	NLLP-CPC-0716-B	52.75	81.25	78.6325	12.0787	1	23.9583	21.0417	4.125	2.70833	1.48375	5.40792	6.08333	44.375	6.58333	0.365417	7.08333	1.875	2.625	5	0	2.625	1302.43
250	Ethiopia	G250	NLLP-CPC-0716-C	52.5	80.75	85.0825	11.0075	1	25	22.2917	3.79167	3.04167	1.185	4.99	8.04167	40.625	4.875	0.294167	8.33333	1.5	3.08333	5	1.6375	2.75	512.721
251	Ethiopia	G251	NLLP-CPC-0723	52.5	79.25	79.5325	10.8133	1	31.6667	17.5833	3.66667	3.41667	1.6025	5.61833	7	39.7083	5.875	2.025	12.5833	0.916667	4.125	5.25	0.366667	2.83333	733.272
252	Ethiopia	G252	NLLP-CPC-0724	56	81	63.7675	9.84292	1	24.1667	20.7917	3.41667	1.66667	2.12917	4.63333	7.5	42.7083	9.50083	0.45375	8.75	1.58333	2.375	3.75	0.679167	1.77896	1643.86
253	Ethiopia	G253	NLLP-CPC-0726	60.25	88.5	73.85	12.0312	1	19.375	16.875	3.20833	1.5	1.21	6.06333	7.91667	41.9167	2.79167	0.366667	8.58333	4	1.625	2.5	0.4	1.98164	769.669
254	Ethiopia	G254	NLLP-CPC-0727	53.5	79.5	81.225	10.6742	1	22.7083	19.4583	3.875	1.2	1.57208	5.18375	7.75	39.1667	5.45833	0.4475	14.4167	4.16667	1.375	4.16667	0.0583333	2.1576	1041.65
255	Ethiopia	G255	NLLP-CPC-0728	50.5	77.5	58.2	9.32625	1	30.625	21.3333	4.5	3.20833	1.53708	5.39875	7.25	42.9167	4.83333	0.444167	10.5833	2.33333	1.66667	3.88889	0.425	1.86478	749.375
256	Ethiopia	G256	NLLP-CPC-0729	57	80.75	76.15	10.0233	1	34.7917	16.2083	4.08333	1.91667	1.21625	4.46792	6.33333	42.5	6.29167	0.3425	11.1667	5.08333	3.5	5	0.441667	2.79167	692.206
257	Ethiopia	G257	NLLP-CPC-0739-A	50.75	77.5	53.8	10.9204	1	32.5	17.8333	4.04167	2.20833	0.97875	4.64667	9.16667	44.375	8.58333	0.4675	11.125	2.75	2.75	6.24917	7.61667	2.91667	718.787
258	Ethiopia	G258	NLLP-CPC-0739-B	53	77.75	69.8175	10.4379	1	20.625	19.625	3.9	1.23333	0.770833	4.26167	8.16667	44.75	3.45833	0.326667	16.6667	1.04167	2.44167	3.33333	0.05	2.22034	798.676
259	Ethiopia	G259	NLLP-CPC-0742	58.5	82.5	69.8675	10.6246	1	29.5833	16.9583	2.70833	2.29167	1.05125	5.24667	6.16667	38.625	6.70833	0.6075	6.66667	4	2.08333	5	0.37625	6	584.007
260	Ethiopia	G260	NLLP-CPC-0745	52.25	77.5	65.4175	11.2871	1	25.8333	15.6667	3.45833	2.54167	1.16208	5.83167	9.70833	40.3333	5.58333	0.276667	11.7917	0.916667	2.41667	5	0.925	1.875	1697.82
261	Ethiopia	G261	NLLP-CPC-0746-A	49.75	76.25	62.15	9.85875	1	19.5833	16.1667	3.79167	2.04167	1.24792	4.275	8.54167	34.375	7.66667	0.400833	12.9167	1	2.00833	5	0.583333	2	1183.42
262	Ethiopia	G262	NLLP-CPC-0746-B	47.75	90.5	84.25	10.06	1	20.4167	23.25	3.25	2.33333	1.9375	4.91458	7.29167	39.4167	6.41667	0.426667	9.91667	1.08333	3.58333	4.16667	0.559583	3.83333	860.662
263	Ethiopia	G263	NLLP-CPC-0747	53.75	83.5	65.15	10.605	1	27.0833	15.9167	4.08333	2.41667	1.35833	5.72292	8.16667	42.7083	5.83333	0.484583	14.2917	1.83333	3.125	5	0.483333	2.83333	679.743
264	Ethiopia	G264	NLLP-CPC-0748-A	53.5	79.25	69.7825	11.5492	1	24.5833	23.0417	4.875	2.08333	1.59667	5.01417	8.125	40.4167	8.04167	0.378333	9.41667	2.70833	2.45833	6.25	0.6875	3.5	514.118
265	Ethiopia	G265	NLLP-CPC-0749	56.5	79.25	65.8825	12.1713	1	22.9167	22.875	4.25	1.41667	3.50667	6.57583	8.58333	41.875	4.54167	0.467917	8.25	4.70833	2.375	4.16667	0.25	2.45833	922.243
266	Ethiopia	G266	NLLP-CPC-0751	50.75	80.75	81.1175	11.3175	1	20.4167	22.9583	4.25	2.1825	1.31417	5.2875	8.5	38.3333	4	0.587083	10.25	1.25	2.66667	5.41667	0.366667	2.90558	632.647
267	Ethiopia	G267	NLLP-CPC-0752	53.75	79.5	81.3825	10.0733	1	23.75	18.375	3.75	2.33333	1.43354	5.05792	8.70833	51.375	6.58333	0.387917	9.58333	2.375	2.33333	4.58333	0.566667	4.20833	800.588
268	Ethiopia	G268	NLLP-CPC-0753	58	82	77.9	13.8117	1	20	22.5833	4.08333	2.375	2.03708	6.42833	6.95833	37.9167	7.41667	0.6725	7	2.65833	2.125	5	0.375	2.08333	850
269	Ethiopia	G269	NLLP-CPC-0754	50.75	81	58.5	9.36417	1	20.8333	20.0833	4.41667	2.75	2.18333	5.29583	10	39.5833	4.66667	0.580833	8.83333	2.16083	2.5825	5	0.45	0.413343	782.132
270	Ethiopia	G270	NLLP-CPC-0755	54	74.25	69.0675	12.5883	1	25	19.1667	3.75	2.66667	1.20917	4.98333	9.95833	38.125	5.20833	0.547083	10.2917	1.5	1.5	5	0.5075	3.66667	1309.52
271	Ethiopia	G271	NLLP-CPC-0756	57.25	81.25	60.0575	9.8775	1	23.125	21.25	2.83333	1.75	1.27667	5.41458	7.75	37.2917	4.79167	0.425	11.2917	1.29167	2.04167	6.25	0.325	1.50597	491.176
272	Ethiopia	G272	NLLP-CPC-0758	54.5	80	73.1	11.2154	1	29.375	19.5	3.5	1	1.09958	5.32083	9	56.6667	4.3	0.410833	15.1667	1.58333	1.88333	5.41667	0.341667	3.16667	1170.55
273	Ethiopia	G273	NLLP-CPC-0760	55.25	78.25	64.5175	11.6633	1	21.25	20.4167	4.79167	3.08333	1.58458	4.7275	8.58333	34.7917	6.25	0.280417	11.875	2	2	5.625	1.33333	2.08333	390.037
274	Ethiopia	G274	NLLP-CPC-0764	56.25	77.5	62.475	10.675	1	27.5	18.3333	3.33333	2.70833	1.02875	3.835	6.20833	32.0833	4.495	0.505417	7.66667	2.16667	1.21667	4.79167	0.0416667	2.58333	820.11
275	Ethiopia	G275	NLLP-CPC-0769	51.5	77	72.0825	8.95167	1	28.5417	13.5	3.54167	1.95833	1.40833	3.93	8.83333	35	7.16667	0.495	9.58333	1.08333	4.20833	5.625	0.5	2.47273	998.64
276	Ethiopia	G276	NLLP-CPC-0772	57	77	65.35	10.0092	1	23.75	17.25	3.91667	1.79167	1.13167	5.64958	7.66667	36.4167	5.33333	1.31333	8.41667	2.25	1.125	5.41667	0.566667	1.75	774.853
277	Ethiopia	G277	NLLP-CPC-0775	54.5	80.75	81.35	9.8475	1	26.25	24.1667	3.16667	2.75	1.94042	6.68542	9.25	41.25	10.875	0.499167	9.04167	2.45833	2.58333	5	0	1.92091	896.581
278	Ethiopia	G278	NLLP-CPC-0777	48.25	75	59.4825	10.0487	1	30.2083	14.1667	3.91667	2.45833	2.23583	5.98667	7.66667	33.9583	5.58333	0.340417	7.54167	1.95833	0.958333	5	0.413333	1.06986	270.478
279	Ethiopia	G279	NLLP-CPC-0778	54.5	81.75	76.75	9.66917	1	21.25	20.5417	3.29167	2.875	1.345	5.00792	7.25	39.7917	5.08333	0.3425	7.33333	11.375	2.33333	5	0.983333	4.48333	696.507
280	Ethiopia	G280	NLLP-CPC-0782	48.5	77.75	82.875	8.93792	1	25.2083	15.625	4.29167	2.25	1.14958	5.10208	7.25	35.4167	7	0.485417	10.3333	1.25	3.5	5	0.766667	1.30807	1001.14
281	Ethiopia	G281	NLLP-CPC-0783	54.75	80.5	64.6	11.3488	1	22.9167	20.8333	3.58333	2.375	4.48333	5.43583	7.66667	38.9167	5.83333	0.275833	5.91667	1.41667	2.58333	5	0.133333	5.625	776.912
282	Ethiopia	G282	NLLP-CPC-0785	50.5	80	51.5	10.1183	1.08333	31.6667	25.25	3.5	2.41667	1.09833	4.30417	7.58333	36.0417	6.04167	0.85	14.25	3.5	3.04167	3.75	0.941667	2.95833	1804.78
283	Ethiopia	G283	NLLP-CPC-0789	57.75	80	56.5425	9.45583	1	24.5842	20	2.75	2.29167	0.991667	4.14417	7.75	32.1667	5.66667	0.261667	10.5417	1.25	3.58333	4.16667	0.0833333	2.63815	971.507
284	Ethiopia	G284	NLLP-CPC-0797	48	77.5	56.85	8.6625	1	23.3333	15.7083	4.75	1.6825	1.97667	5.02167	7	40.8333	4.83333	0.600417	15.2083	1.08333	1.79167	5.83333	0.291667	1.64917	251.544
285	Ethiopia	G285	TVU-7144	54.5	81.75	74.2325	11.9825	1	22.9167	17.9167	3.29167	2.20833	1.46833	4.40542	8.08333	33.9167	5.75	0.260833	10.6667	1.375	4.08333	3.75	1.025	5.5	566.287
286	Ethiopia	G286	TVU-7149	50.5	76.25	71.1825	11.2821	1	25.8333	25.7917	4.25	3.29167	1.25458	3.77083	7.20833	40	3.84917	0.5425	12	3.25	2.91667	5.20833	0.458333	3.125	1592.17
287	Ethiopia	G287	TVU-7148	56.25	81.75	65.7325	10.0592	1	24.1667	12.9167	3.83333	2.83333	0.82625	5.9475	8.5	36.25	4.125	0.57	7.33333	1.75	1.83333	3.75	0.4375	3.56775	1493.09
288	Ethiopia	G288	TVU-7146	55.75	83	53.365	11.7254	1.125	25.2083	23.4167	3.58542	2.41953	2.19792	4.54167	6.45833	31.6667	7.16667	0.471667	13.625	2.54167	2.08333	5.625	0.983333	3.125	759.485
289	Ethiopia	G289	TVU-14568	51.5	81.25	61.4125	8.54375	1	19.375	20.4583	3.33333	1.625	1.38833	4.19708	7.41667	29.7917	6.58333	0.512083	11.3333	0.833333	2.58333	4.58333	0.525	2.6	502.831
290	Ethiopia	G290	TVU-15548	56.5	83	62.85	9.27333	1	26.6667	17.9167	3.83333	2.375	1.38417	4.9375	8.08333	37.0833	4.70833	0.508333	13.25	1.125	3	6.25	0.529167	3.23968	1539.85
291	Ethiopia	G291	Bole	53.5	76.75	80.3	10.2792	1	24.375	23.0833	3.91667	3.29167	1.74583	5.6325	5.16667	37.5	8.20833	0.723333	11.4583	0.791667	1.83333	5.625	1.14905	2.48604	989.926
292	Ethiopia	G292	Kanketi	51.5	75.5	49.575	11.4325	1	22.0833	26.9167	3.625	1.58333	0.665417	5.525	6.20833	37.5	6	0.445833	15.25	2.33333	2.775	6.25	0.358333	3.375	1118.93
293	Ethiopia	G293	Assebot	56.75	79.5	67.475	9.55562	1	22.8125	22.875	3.875	1.83333	1.70042	5.36417	7.79167	42.0833	5.58333	5.48167	10.25	0.916667	2	6.25	1.0125	1.6961	1404.41
294	Ethiopia	G294	IT	52.25	79	78.4175	11.0692	1	19.1667	17.0833	3.625	1.83333	1.25083	4.69917	8.45833	32.9167	4.875	2.5325	12.3333	1.83333	1.91667	5	0.775	2.625	739.191
295	Ethiopia	G295	Asrat	54	76.5	70.95	9.32167	1	25.8333	20.3333	7.5	1.83333	1.26833	4.3325	8.45833	37.2917	4.58333	0.33875	9.125	4.08333	2.33333	5	0.566667	1.85951	903.566
296	Ethiopia	G296	Bekur	50.75	70.25	67.425	9.96667	1	28.5417	21.75	3.58333	2.04167	2.61333	5.12417	8.08333	33.9583	4.33333	0.465	11.5833	2.08333	2.66667	3.95833	0.15	2.375	842.757
297	Ethiopia	G297	ACC-227-104-A-21	48.5	78	74.2	10.9417	1	28.5417	35.8333	3.625	3	1.2225	4.81875	10.5417	34.5	5.375	0.5675	10.1667	3.33333	2.625	5	0.483333	3.125	437.684
298	Ethiopia	G298	ACC-227-104-C-21	56.75	85.25	81.725	12.4867	1	24.1658	31.1667	4.5	1.875	1.12208	4.63958	7.875	35.75	6.91667	0.572917	8.91667	1.75	2.91667	5.41667	0.358333	0.963439	646.618
299	Ethiopia	G299	NLLP-CPC-07-67-A-21	54.75	78.25	82.75	10.6792	1	24.1667	13.75	3.66667	2.5	1.2575	5.56167	14.2925	54.1667	5.04167	0.355833	12.5417	1.41667	1.54167	6.25	0.533333	2.22762	917.316
300	Ethiopia	G300	NLLP-CPC-07-27-B-21	48.75	78.25	60.7325	10.1929	1	27.0833	19.75	3.41667	1.83333	0.933333	4.02167	14.4592	36.9167	3.66667	3.92167	5.91667	0.791667	2.25	5	0.483333	3.5	583.897
301	Ethiopia	G301	NLLP-CPC-07-43-B-21	50.25	75	87.05	10.52	1	18.3333	18.5	4.33333	3.125	3.6875	6.43875	7.83333	31.6667	7.29167	0.5325	11	3.08333	1.9375	5	0.595833	4.66583	1157.76
302	Ethiopia	G302	NLLP-CPC-07-08-21	59.25	84.5	84.3825	11.0929	1	40.625	18.4167	4.04167	2.54167	1.58667	5.41917	9.04167	40.4167	5.04167	0.484167	12.3333	3.20833	1.875	7.5	2.34167	2.25836	705.956
303	Ethiopia	G303	NLLP-CPC-116-B-21	52.75	79	81.2	12.2633	1	26.25	23.3333	5.66667	3.41667	1.43917	3.84958	6.58333	37.4167	3.01333	1.1375	11.7917	8.58417	2.08333	5	0.475	2.11756	440.441
304	Ethiopia	G304	NLLP-CPC-117-21	53	81.25	73.7	11.3892	1	25.2083	20.3333	3.79167	2.25	1.0725	4.28667	7.54167	35.9583	5.5	0.32125	10.2917	1.66667	1.5	5.5	0.65	2.33333	481.176
305	Ethiopia	G305	NLLP-CPC-109-A-21	52.75	80.75	84.8825	11.5633	1	25	21.7083	5	3.5	1.23417	5.24792	7.16667	37.0833	5.20833	0.435417	7.58333	1.95833	2.16667	6.25	0.358333	3	632.507
306	Ethiopia	G306	NLLP-CPC-107-21	52.75	81.5	66.9675	11.8821	1	27.2917	17.8333	4.04167	2.875	1.8775	5.12958	9.04167	31.9167	3.83333	0.341667	8.66667	3.70833	2.5	5	0.854167	5.16667	482.574
307	Ethiopia	G307	MCP-23-B-21	47.25	68.5	54.425	9.26708	1	28.5417	25.2083	4.29167	1.875	1.8425	4.715	8.04167	32.9167	4.45833	0.369583	12.375	3.66667	2.16667	5	0.15	2.5	498.603
308	Ethiopia	G308	ACC-244-804-B-21	55.75	82.25	72.725	11.9321	1	30	15.5833	2.91667	0.583333	1.22042	3.97167	7.66667	43.9583	5.5	0.924583	9.25	5.16667	2.91667	5	0.495833	1.20833	758.346
309	Ethiopia	G309	NLLP-CPC-07-67-C-21	60.25	85	73.1	11.6525	1	27.9167	20.6667	4.91667	1.66667	1.40667	5.26583	7.04167	38.3333	6.58333	0.736667	8.25	3.45833	2.875	5	0.5	3.33333	568.382
310	Ethiopia	G310	NLLP-CPC-07-67-B-21	56	76.25	76.075	10.2467	1	28.75	18.5417	3.45833	1.70833	1.35792	4.92875	8.83333	41.25	4.08333	0.364167	9.625	8.16667	2.29167	6.25	1.31667	1.27493	682.941
311	Ethiopia	G311	NLLP-CPC-07-95-A-21	51.5	77.5	80.35	10.6369	1	22.1875	17.3125	4.125	1.45833	1.54	5.44417	7.45833	41.0417	4.625	0.369583	7.54167	0.583333	2.15	7.5	0.504167	2.875	843.176
312	Ethiopia	G312	NLLP-CPC-07-93-21	57.25	80.75	93.275	11.3354	1	25.4167	21.375	3.16667	1.20833	1.64583	4.43917	6.375	40.875	2.66667	0.404167	8.08333	1.08333	1.95833	5.625	0.133333	1.25	893.676
313	Ethiopia	G313	NLLP-CPC-07-06-B-21	52.75	81.5	75.0325	11.7142	1	24.5833	17.7083	3.91667	1.41667	1.89625	4.97583	6.16667	36.25	6.58333	0.253333	7.66667	3.3025	3.66667	5	0.291667	3.54167	873.75
314	Ethiopia	G314	NLLP-CPC-07-96-21	47	76.75	77.0175	9.69833	1	30	14.6667	5.125	1.66667	0.925833	4.19042	9.20833	33	4.70833	0.515	9.16667	4.27417	3.875	5	0.275	5	893.419
315	Ethiopia	G315	NLLP-CPC-07-99-21	49	79.75	89.1	11.6529	1	25.8333	26.9583	3.41667	2.5	1.67458	4.70083	7.16667	40.2083	10	0.565	12.0417	2.16667	2.16667	5	0.775	0.254339	579.485
316	Ethiopia	G316	NLLP-CPC-07-36-21	54.75	82.75	75.2	9.9125	1	27.9167	17	3.66667	3.16667	1.18792	5.43125	7.33333	39.25	3.04167	0.735	13.3333	3.16667	2.33333	4.75	0.4625	3.41667	225.11
317	Ethiopia	G317	NLLP-CPC-07-37-A-21	47.25	79	91.5	9.82833	1	17.9167	23.3333	7.45833	2.70833	1.12083	5.23917	9.44833	36.6667	4	0.281667	8.125	2.625	2.625	5	0.375	4.875	1188.42
318	Ethiopia	G318	BACK EYE BEAN	49.75	79	63.7825	11.3246	1	27.5	21.8333	4.125	2.625	1.24833	4.88917	7.83333	34.0833	5.83333	0.6175	8.41667	1.25	3.33333	6.25	0.454167	3.20833	822.941
319	Ethiopia	G319	NLLP-CPC-07-48-21	52.5	79.5	80.1325	11.5433	1	19.7917	28.0417	4.875	2.33333	1.37292	3.79917	9.70833	27.5425	3.70833	0.535	8.75	1.54167	1.16667	5	0.841667	1.94246	753.824
320	Ethiopia	G320	NLLP-CPC-07-133-21	54.5	81.25	88.45	12.4421	1	26.6667	22.6667	4.83333	3.16667	1.52667	5.81292	6.33333	37.7083	4.76583	0.363333	12.8333	1.05833	0.833333	5.5	0.483333	2.58333	557.868
321	Ethiopia	G321	NLLP-CPC-07-145-21	52.5	79.25	62.4175	11.015	1	27.9167	20.8333	4	1.95833	0.955417	4.5275	8.91667	41.25	5.33333	0.385417	9.58333	2.16667	2.875	6.25	0.216667	2.68518	584.191
322	Ethiopia	G322	NLLP-CPC-07-167-21	56.75	83	76.55	11.5308	1	22.9167	18.125	4.25	1.875	1.35917	5.0075	9.66667	41.0833	4.04167	0.379583	11.2917	2.08333	2.16667	5	0.3875	2.75	911.544
323	Ethiopia	G323	White wonder	56.75	82	74.115	12.3542	1.375	26.875	20.125	4.75	3.33333	1.7075	5.58417	7.66667	40	4.75	0.94875	13.3333	1.04167	2.16667	5.83333	0.983333	3.5	1349.71
324	Ethiopia	G324	Jshartesfirbir	55.5	82.75	70.875	12.8863	1	24.375	21.5833	3.95833	3	1.61875	5.14917	9.91667	38.125	5.08333	0.585833	11.2083	1.66667	2.69167	4.58333	0.075	2.75	473.162
			Mean	53.2758	78.5262	71.2606	10.8842	1.00618	26.1077	19.8468	3.90557	2.37431	1.43539	5.07695	8.15321	39.075	5.37506	0.646881	10.2896	2.50981	2.49516	5.15229	0.682604	2.71619	815.632
			Maximum	62	90.5	110.35	14.4425	1.375	45.4167	37.6167	7.5	5.67083	4.48333	8.08917	14.9167	63.1125	11.1667	5.48167	27.9167	11.5417	4.5	7.50083	7.61667	6.625	1804.78
			Minimum	45.25	66	38.8	8.09	0.916667	17.9167	11.7083	2.25	0.583333	0.662917	3.21333	5.16667	26.75	2.33333	0.154167	3.88333	0.583333	0.5	2.5	0	0.254339	220.478
			Standard error (SE)	0.183597	0.203342	0.723355	0.0663564	0.00205339	0.203484	0.223746	0.0394067	0.0358905	0.0297625	0.0444712	0.0872057	0.282393	0.0821744	0.0423608	0.160476	0.0965101	0.0427013	0.0461865	0.0549749	0.0655139	17.4552
			Coefficient of variation (CV)	10.3369	9.78821	5.88109	20.2691	4.99183	22.5043	29.4158	19.472	15.0823	25.6329	26.027	49.7442	18.875	43.7675	28.8964	27.2734	20.1197	52.1788	23.017	19.7349	63.6174	18.1614
